# Supplementary material for: The P3N-PIPO Protein Encoded by Wheat Yellow Mosaic Virus Is a Pathogenicity Determinant and Promotes Its Pathogenicity through Interaction with NbRLK6 in Nicotiana benthamiana
Source: MDPI journal article supplement (doi:10.3390/v14102171), 2022-09-30
Supplement: s1 [file s1]

### **The PCR amplified fragment for NbRLK6 VIGS**

ATGTGCCCAGGATGTGACATGCGAAGATTCTGATGGTTGTGGCAGCGACCACACTGCACTTATAGCAGGTTT  
GACATCAGGTCTGGGTGTGGCAGTGATTGCTGTTGTAATTGCAGTTTTTGTGTACAGACGTCATAAGCGAAT  
TAAGGATGCCCAAGATCGACTAGCTCGCGAACGGGAAGATATTCTTAGCTCTGGGGGTGTAA
