# Supplementary material for: The P3N-PIPO Protein Encoded by Wheat Yellow Mosaic Virus Is a Pathogenicity Determinant and Promotes Its Pathogenicity through Interaction with NbRLK6 in Nicotiana benthamiana
Source: MDPI journal article supplement (doi:10.3390/v14102171), 2022-09-30
Supplement: s1 [file s1]

**Table.S1. List of Primers Used in This Study**

| Primer Name           | Sequence 5'-3'                             |
|-----------------------|--------------------------------------------|
| Lic-NbRLK6-F:         | CGACGACAAGACCGTCACCATGGCAGCCACTTTCCAGCGC   |
| Lic-NbRLK6-R:         | GAGGAGAAGAGCCGTCGAGCTTTTGCAGTAGCAATACT     |
| NbRLK6-GW-F:          | AAAAAGCAGGCTCCATGGCAGCCACTTTCCAGCGC        |
| NbRLK6-GW-R:          | AGAAAGCTGGGTCAGCTTTTGCAGTAGCAATACT         |
| TRV-NbRLK6-F          | CGACGACAAGACCGTCACCATGTGGCAACGAATTGGGGAAGA |
| TRV-NbRLK6-R          | GAGGAGAAGAGCCGTCGGCCATTATAGGTCGTGGGCT      |
| WYMV-P3NPIPO-F        | TATGGAGCAGACAGCAGCCCAG                     |
| WYMV-P3NPIPO-R-(STOP) | TCTACGAAAGATAGGTATAGCGCGAA                 |
| Lic-P3NPIPO-F:        | CGACGACAAGACCGTCACCATGGAGCAGACAGCAGCCCAG   |
| Lic-P3NPIPO-R:        | GAGGAGAAGAGCCGTCGCGAAAGATAGGTATAGCGCGAA    |
| WYMV-P3NPIPO-GW-F     | AAAAAGCAGGCTCCATGGAGCAGACAGCAGCCCAG        |
| WYMV-P3NPIPO-GW-R     | AGAAAGCTGGGTCCTACGAAAGATAGGTATAGCGCGAA     |
| qRT-RLK6-F:           | CGAATTAAGGATGCCCAAGA                       |
| qRT-RLK6-R:           | TCTTTGCCGGTAAACAGCTT                       |
| qRT-ubc-F             | TTTCGGTCCTGATGATACTCCC                     |
| qRT-ubc-R             | CACAGAGCAAAGACTGGATTGA                     |
| qRT-PVXCP-F:          | CCGCAGCTATCACTCCCCAA                       |
| qRT-PVXCP-F:          | TGCAACAGTCGTTCTGTGA                        |
